# Supplementary material
Source: Springer Nature journal article supplement (https://www.springermedizin.de/resource/supplementary/12891_2010_1174_MOESM2_ESM.pdf/9507260)

(A) TNF $\alpha$

(A-1)

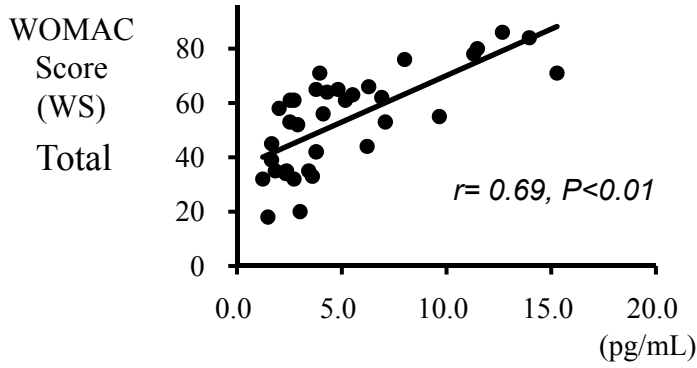

(B) IL-6

(B-1)

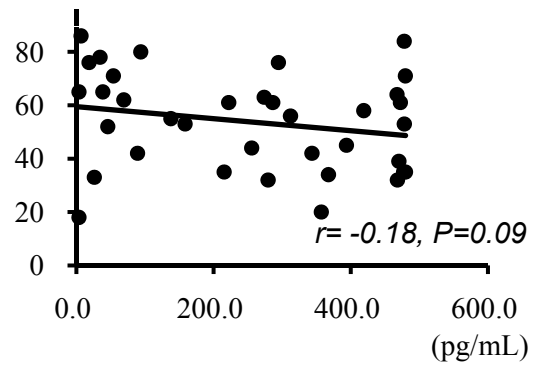

WS-Pain

(A-2)

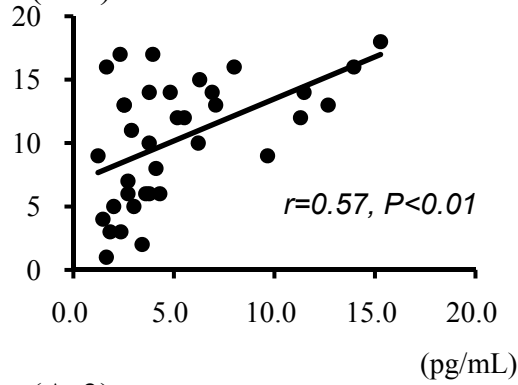

(B-2)

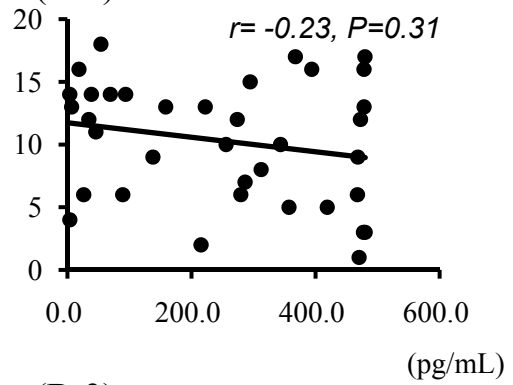

WS-Stiffness

(A-3)

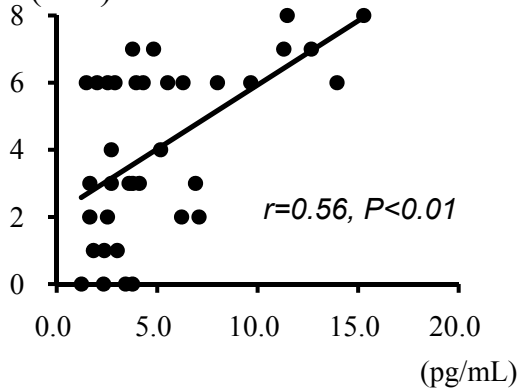

(B-3)

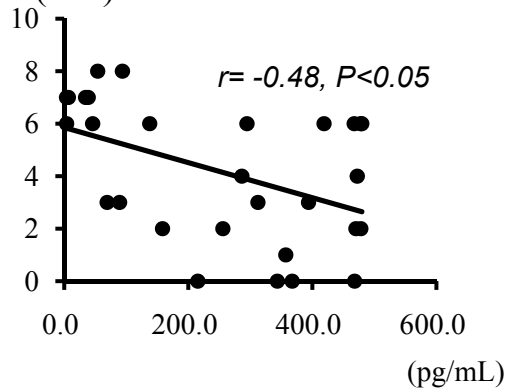

WS-Physical function

(A-4)

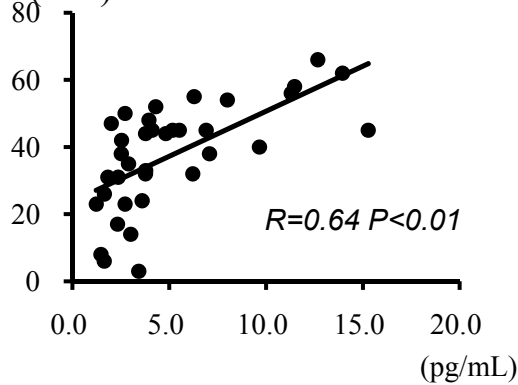

(B-4)

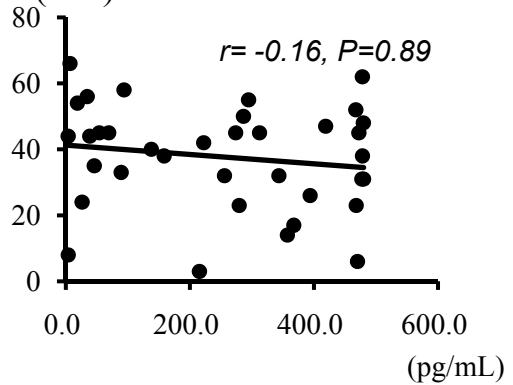

Supplement: MOESM2 [file 9507260]
